# Supplementary material
Source: Springer Nature journal article supplement (https://www.springermedizin.de/resource/supplementary/13054_2012_1705_MOESM2_ESM.pdf/9711338)
Supplement: MOESM2 [file 9711338]

705 Danish patients were included in the 6S-trial

354 patients were assigned to HES

351 patients were assigned to Ringer's Acetate

212 died before 11th March 2012  
2 address unknown

195 died before 11th March 2012  
1 address unknown

140 survivors received questionnaires by mail

155 survivors received questionnaires by mail

82 responded by mail  
16 responded by phone interview

75 responded by mail  
17 responded by phone interview

3 SF-36 questionnaires were unanswered  
2 pruritus questionnaires were unanswered

5 SF-36 questionnaires were unanswered  
3 pruritus questionnaires were unanswered

95 SF-36 questionnaires were analysed  
96 pruritus questionnaires were analysed

87 SF-36 questionnaires were analysed  
89 pruritus questionnaires were analysed
